# Supplementary material for: Unique Phase Transition of Exogenous Fusion Elastin-like Polypeptides in the Solution Containing Polyethylene Glycol
Source: MDPI journal article supplement (doi:10.3390/ijms20143560), 2019-07-20
Supplement: s1 [file s1]

# Supplementary Materials

## Unique Phase Transition of Exogenous Fusion Elastin-like Polypeptides in the Solution Containing Polyethylene Glycol

Zhongqi Ge, Ziyang Xiong, Dandan Zhang, Xialan Li \* and Guangya Zhang \*

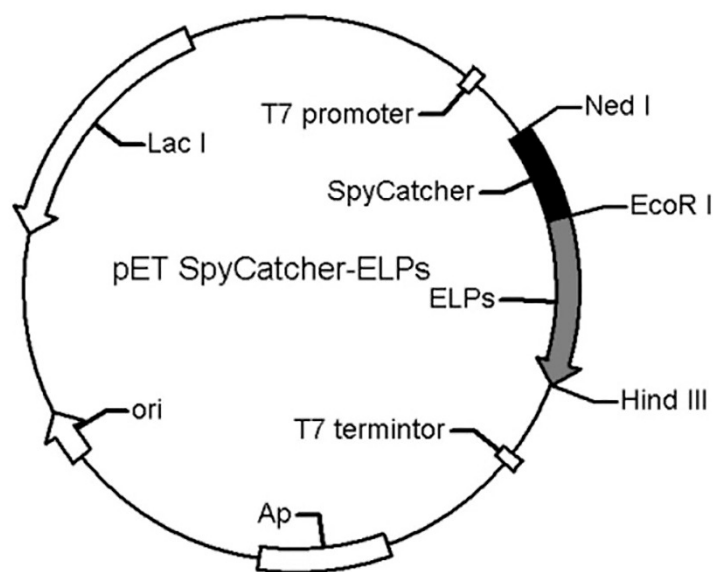

**Figure S1.** Plasmid mapping of expression vector of E-C (SpyCatcher-ELPs<sub>40</sub>)

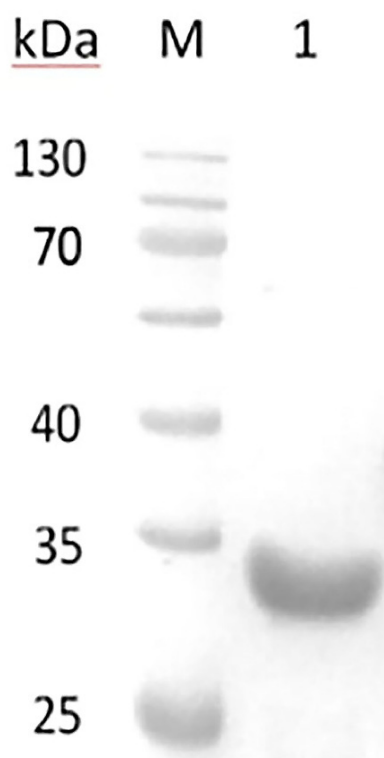

**Figure S2.** The SDS-PAGE of E-C. M: molecular mass marker; lane 1: E-C.

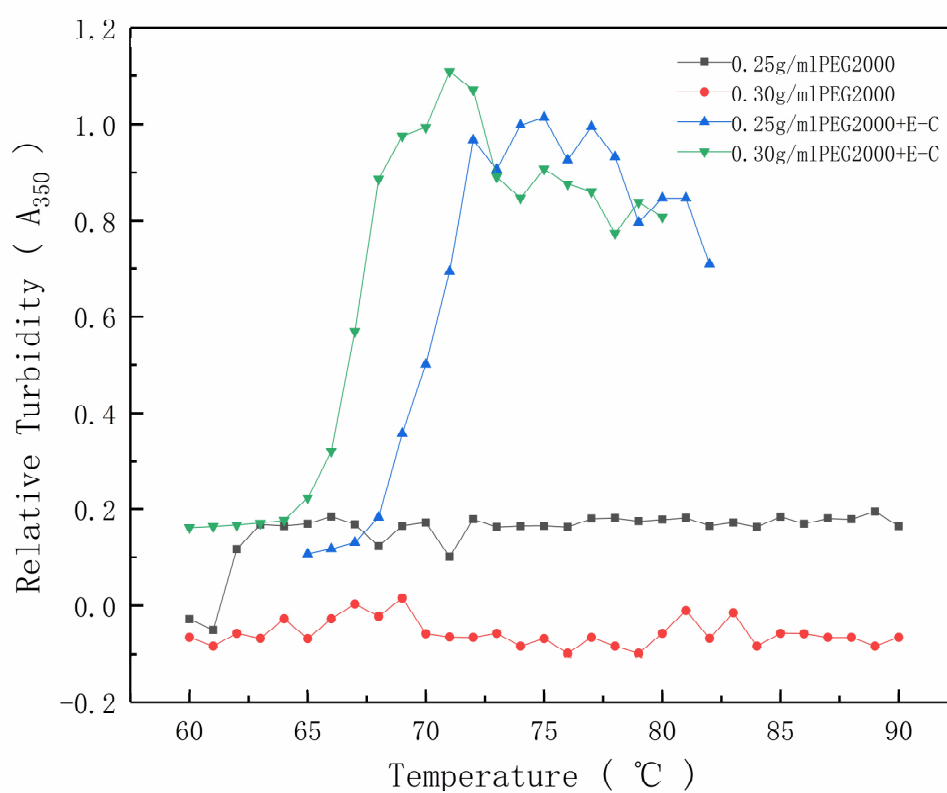

**Figure S3.** Effects of PEG2000 on the phase transitions of E-C in 0.3mol/L  $\text{Na}_2\text{CO}_3$  solution.

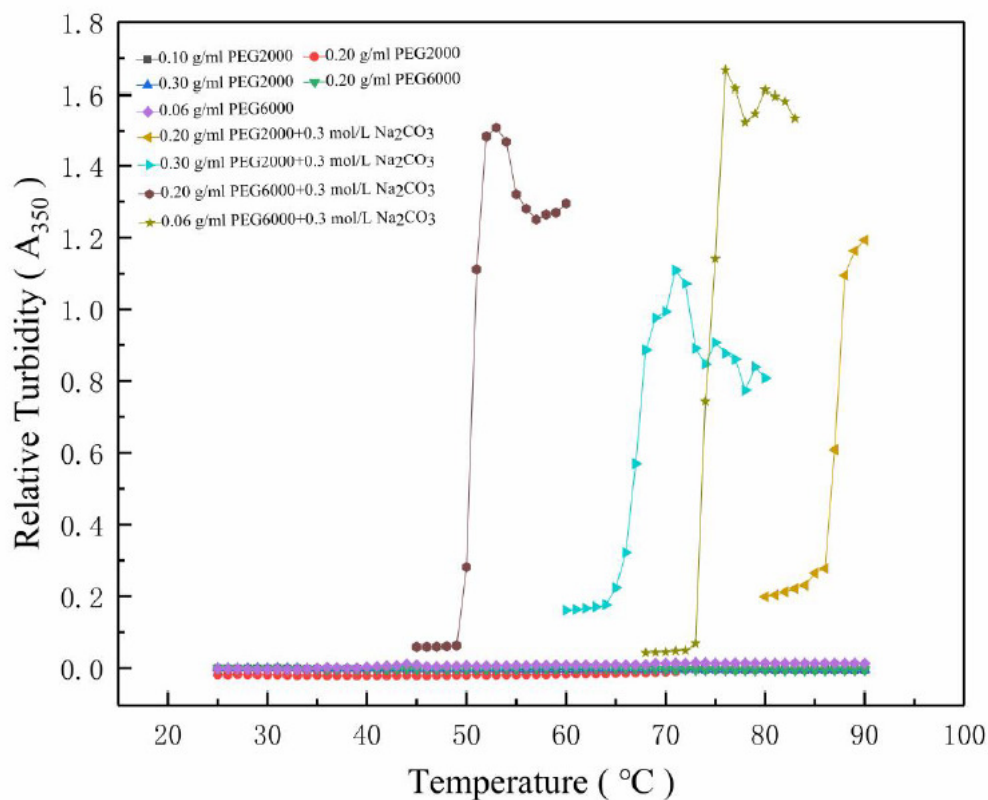

**Figure S4.** Effects of Na<sub>2</sub>CO<sub>3</sub> on the phase transitions of E-C in PEG2000 solution.

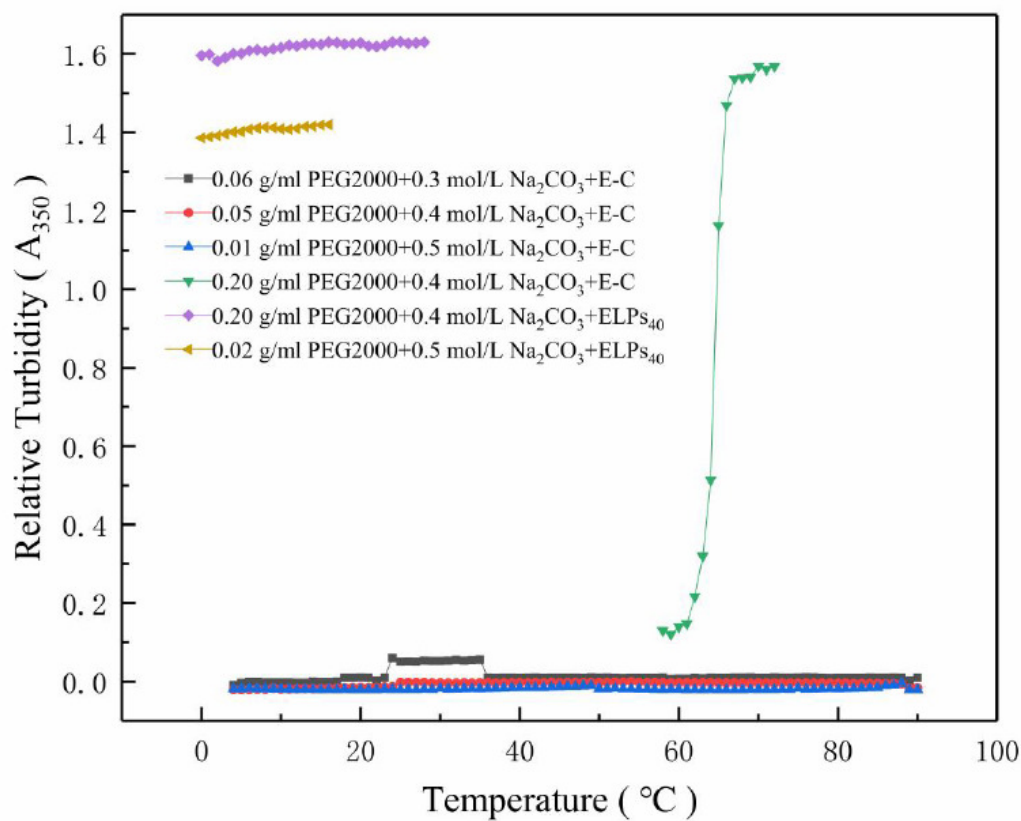

**Figure S5.** Effects of PEG/Na<sub>2</sub>CO<sub>3</sub> concentration on phase transitions of ELPs<sub>40</sub> and E-C.
